# Supplementary material
Source: Springer Nature journal article supplement (https://www.springermedizin.de/resource/supplementary/12931_2010_1058_MOESM4_ESM.pdf/9425546)

**a**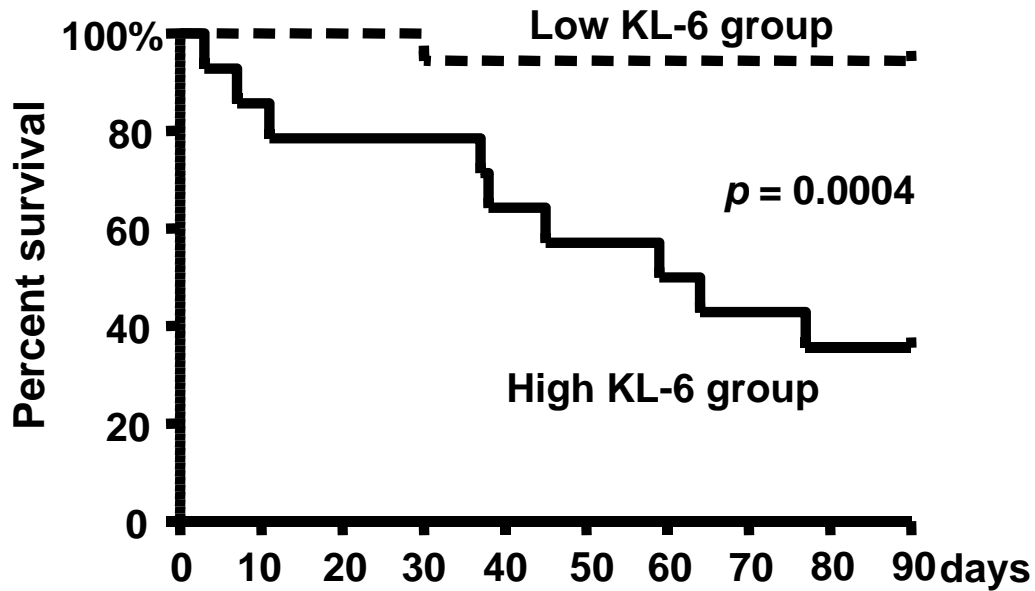**b**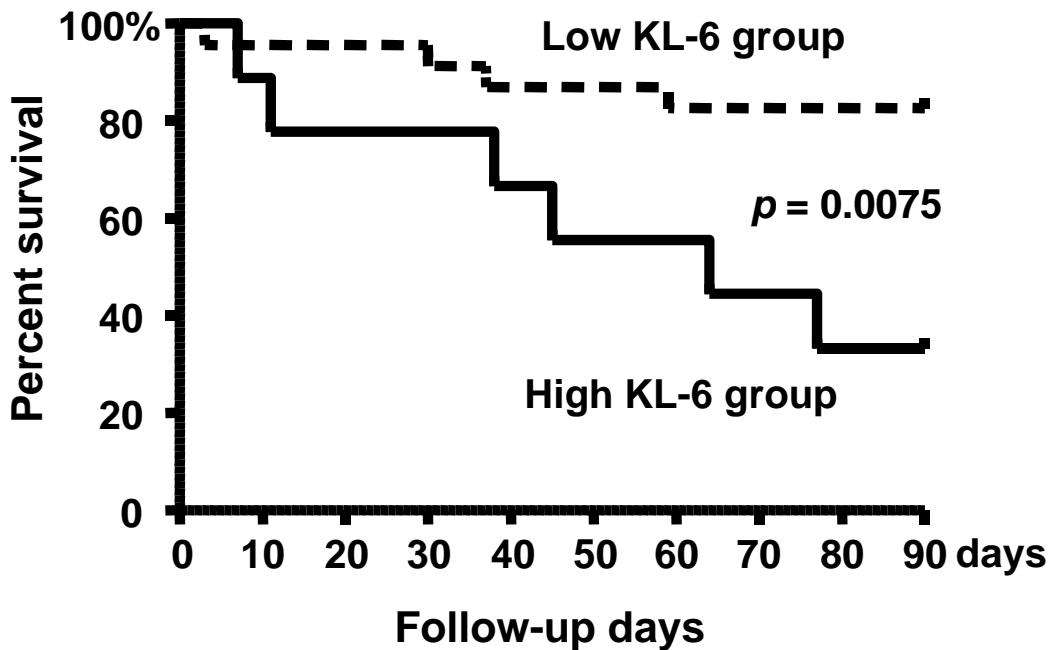

Supplement: MOESM4 [file 9425546]
